# Supplementary material for: One-step synthesis of Ag–reduced graphene oxide–multiwalled carbon nanotubes for enhanced antibacterial activities
Source: Royal Society of Chemistry journal article supplement (doi:10.1039/c4nj02275k), 2015-01-01
Supplement: c4nj02275k1.pdf [file c4nj02275k1.pdf]

## New Journal of Chemistry Supporting information for

### One step synthesis of Ag-reduced graphene oxide-multiwalled carbon nanotubes for enhanced antibacterial activities

Leila Shahriary<sup>a</sup>, Roopa Nair<sup>b</sup>, Sushma Sabharwal<sup>b</sup>, and Anjali A. Athawalea<sup>a</sup>

S1.

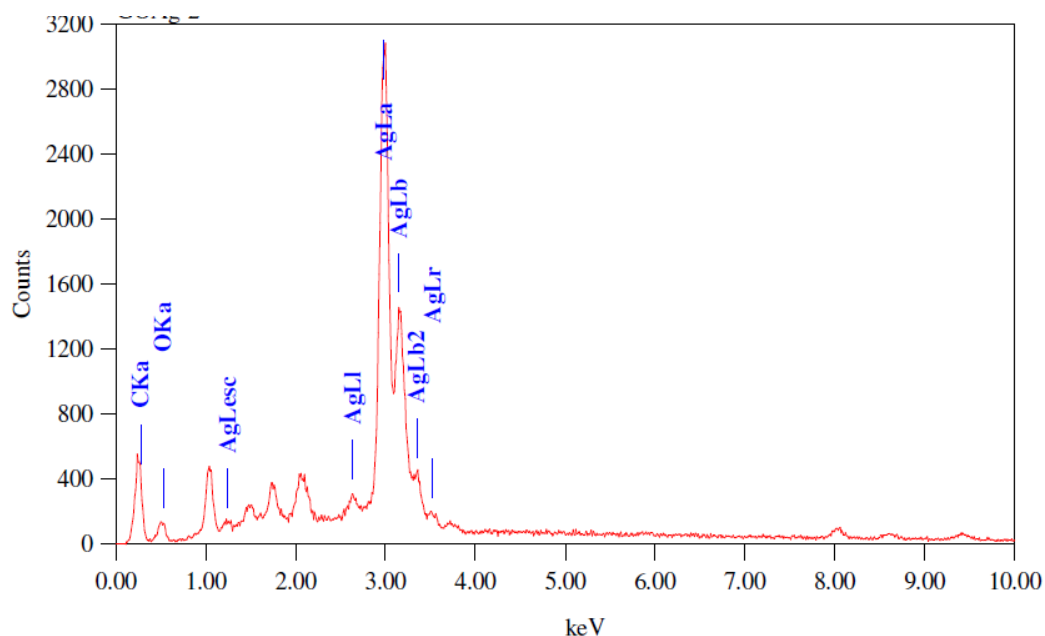

ZAF Method Standardless Quantitative Analysis  
Fitting Coefficient : 0.6514

| Element | (keV) | mass%  | Error% | At%    | Compound | mass% | Cation |
|---------|-------|--------|--------|--------|----------|-------|--------|
| C K     | 0.277 | 3.46   | 0.17   | 19.13  |          |       |        |
| O K     | 0.525 | 6.08   | 2.03   | 25.23  |          |       |        |
| Ag L    | 2.983 | 90.45  | 1.13   | 55.64  |          |       |        |
| Total   |       | 100.00 |        | 100.00 |          |       |        |

Fig.S1. EDX analysis for Ag-rGO

S2.

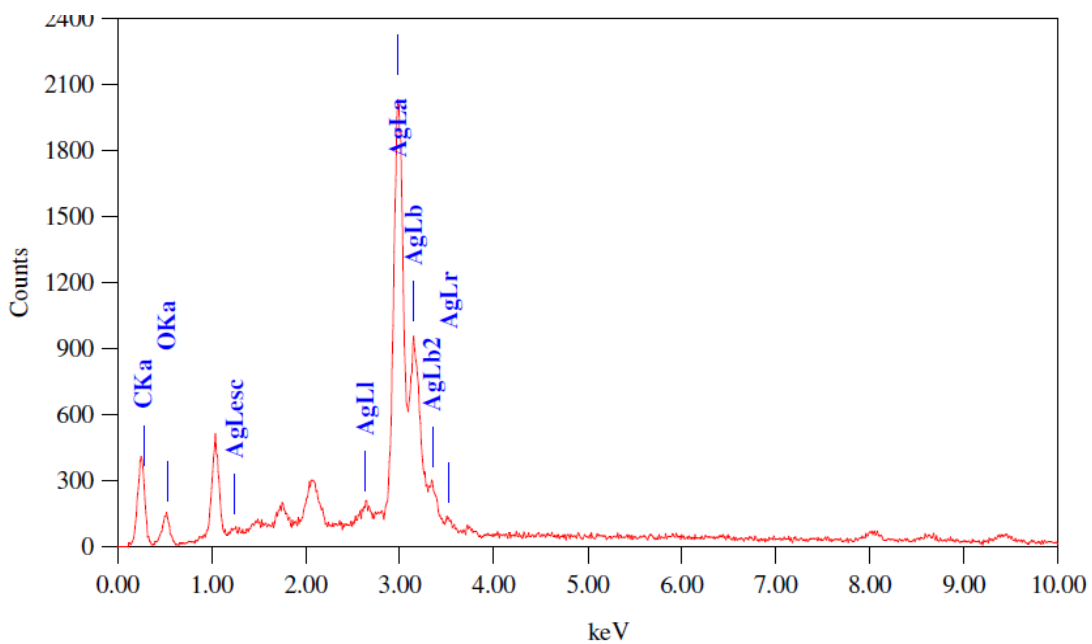

ZAF Method Standardless Quantitative Analysis

Fitting Coefficient : 0.6779

| Element | (keV) | mass%  | Error% | At%    | Compound | mass% | Cation |
|---------|-------|--------|--------|--------|----------|-------|--------|
| C K     | 0.277 | 3.87   | 0.17   | 17.83  |          |       |        |
| O K     | 0.525 | 11.14  | 1.98   | 38.56  |          |       |        |
| Ag L    | 2.983 | 84.99  | 1.11   | 43.61  |          |       |        |
| Total   |       | 100.00 |        | 100.00 |          |       |        |

9

Fig. S2. EDX analysis for Ag-MWCNTs

S3

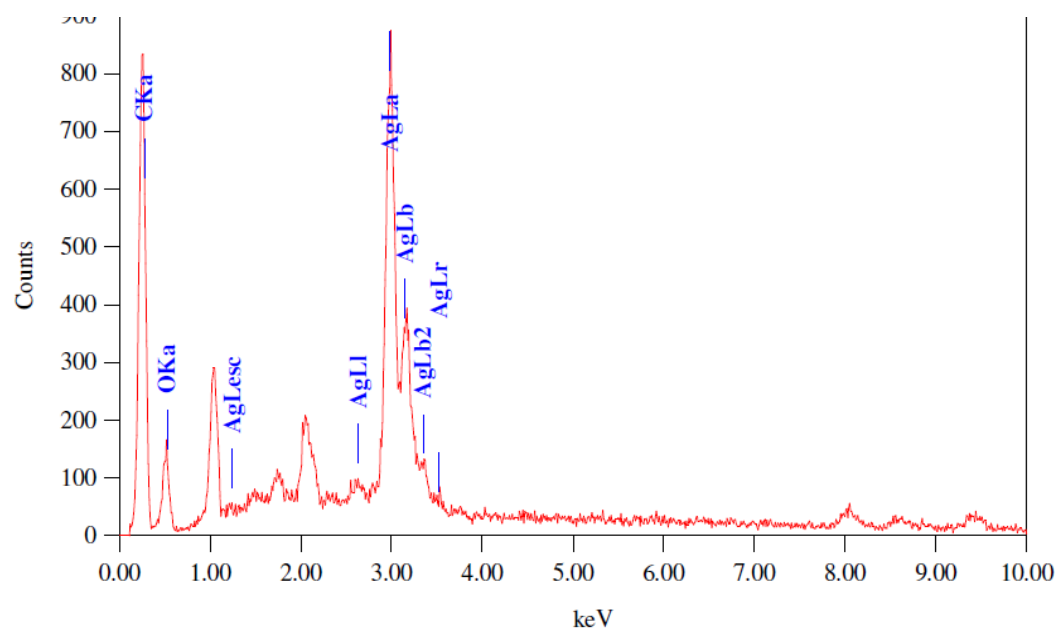

ZAF Method Standardless Quantitative Analysis  
Fitting Coefficient : 0.7617

| Element | (keV) | mass%  | Error% | At%    | Compound | mass% | Cation |
|---------|-------|--------|--------|--------|----------|-------|--------|
| C K     | 0.277 | 18.30  | 0.26   | 45.50  |          |       |        |
| O K     | 0.525 | 20.05  | 2.88   | 37.43  |          |       |        |
| Ag L    | 2.983 | 61.65  | 1.58   | 17.07  |          |       |        |
| Total   |       | 100.00 |        | 100.00 |          |       |        |

Fig. S3. EDX analysis for Ag-rGO-MWCNTs

S4. Table of comparison for data presented in S1, S2, and S3.

| Material/element At% | Ag   | C    | O    |
|----------------------|------|------|------|
| Ag-rGO               | 55.6 | 19.1 | 25.2 |
| Ag-MWCNTs            | 43.6 | 17.8 | 18.5 |
| Ag-rGO-MWCNTs        | 17.0 | 45.5 | 37.4 |

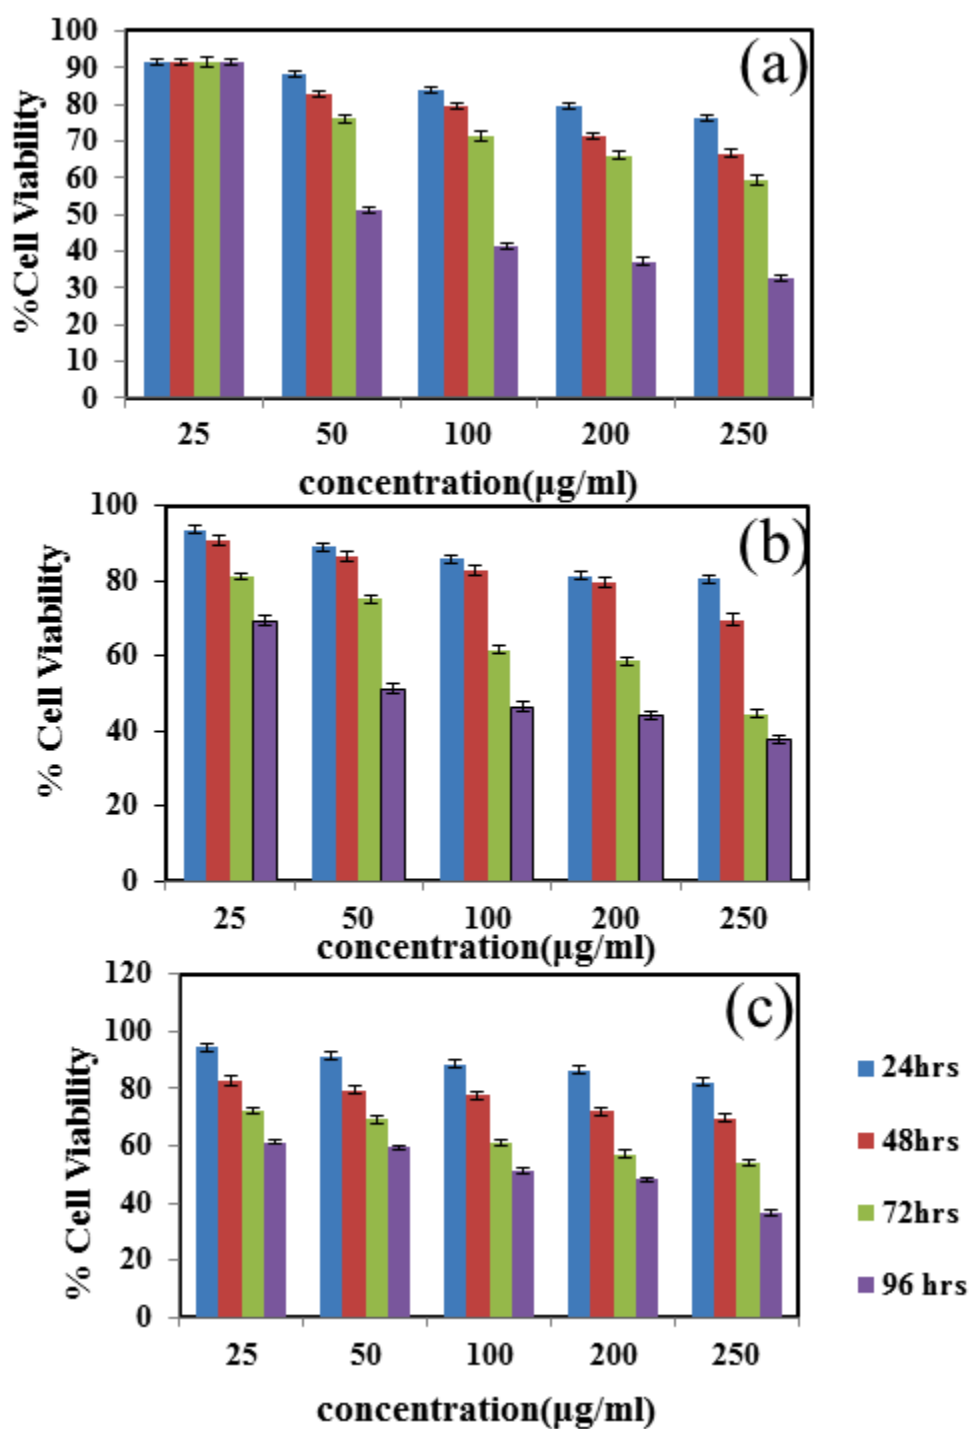

Fig. S5. Viability of Hela cancer cell lines after treatment with (a) Ag-rGO, (b) Ag-MWCNTs and (c) Ag-rGO-MWCNTs.
